# Supplementary material for: Characterization of the Genetic Architecture for Fusarium Head Blight Resistance in Durum Wheat: The Complex Association of Resistance, Flowering Time, and Height Genes
Source: Front Plant Sci. 2020 Dec 23;11:592064. doi: 10.3389/fpls.2020.592064 (PMC7786293; doi:10.3389/fpls.2020.592064)
Supplement: Supplementary file 2 [file Table_2.xlsx]

## Sheet: _TableS3_
Table S3 QTL names, physical positions, associated traits, explained phenotypic variance and significance of association of each significant marker of QTL region across the traits associated with Fusarium head blight incidence (INC), index (IND), severity (SEV), days to anthesis (DTA), and plant height (HT) identified from the durum association mapping panel across environments. The –log10 (p val…
						DTA			HT			Incidence								Index								Severity									Genotypes of lines from the durum association mapping population
QTL	SNP marker	Chr	cM	Mb (CS)	Mb (Svevo)	MD2015	MD2016	MD2017	MD2015	MD2016	MD2017	BD2015	BD2016	BD2017	IH2015	IH2016	MD2015	MD2016	MD2017	BD2015	BD2016	BD2017	IH2015	IH2016	MD2015	MD2016	MD2017	BD2015	BD2016	BD2017	IH2015	IH2016	MD2015	MD2016	MD2017	FHB resistance alleles	A0022&C287	A0022&C555	A0022&D284	A0022&D368	A0022&D481	A0318-FD*04	A0434-ER01	A0465&AG014	A0509&AB054	A0520-HD04	A0580-D12L03	A0580-D13D04	A0580-D53H02
1A.1	BS00083459_51	1A	16	13418406	NA	0.3	1.2	0.3	0.8	0.2	0.5	0.9	1.8	1.6	1.5	0.9	0.2	2.9	2.6	0.8	1.5	0.2	1	0.8	0.3	2.7	0.8	1	2.3	0.1	1.4	0.2	0.4	3.4	0.9	A	G	G	G	G	G	R	G	G	G	G	R	R	R
	BS00039749_51	1A	21	20889591	NA	0	0.9	0.3	0.4	0.4	0.4	1.1	1.4	1.8	2.4	0	0	3.2	2.9	0.2	1.2	0.2	0.8	0.1	0.2	2.3	0.6	0.5	1.3	0.2	0.8	0.1	0.4	2.1	0.8	A	A	C	C	A	C	C	C	C	C	C	C	C	C
1A.2	CAP11_c6014_160	1A	50	365508700	358935623	0	0.4	0.3	0.2	0.3	1.9	3.6	0.9	2.1	2.1	0.5	0.7	2.1	1.5	3.4	1.9	2.6	0.5	0.4	1.4	1.8	1.7	3.2	1.2	2.5	0.5	0.2	1.2	1.9	2	A/G	G	R	R	R	R	R	R	R	R	R	G	G	G
1A.3	RFL_Contig399_1148	1A	111	549420825	NA	2.3	1.9	2.6	1.3	1.8	0.4	0.2	3.2	1.4	0.2	0.6	2.2	1.3	1.1	0.8	1.8	0.9	0.4	0.6	1.6	1.7	1.8	0.7	0.8	0.6	0.4	0.8	0.4	1	1.4	A	G	G	G	G	G	G	G	A	G	G	G	G	A
	BS00021990_51	1A	142	580422461	572868704	1.1	1.6	1	0	0.4	0.3	0.4	1.2	1.2	0.4	1.7	1.7	1.6	1.2	1.3	3	1.8	0.2	0.9	0.4	1.9	1.3	1.3	3.4	1.5	0.2	0.6	0.4	1.7	0.8	M	A	M	M	A	A	M	M	A	A	A	M	M	M
1B.1	RAC875_c32077_284	1B	77	544130182	536203667	0.9	0	2.9	0.3	1.6	0.9	1.4	3.7	2.1	0.7	0.6	0.2	2.3	6.4	1.6	1.8	0.6	0.7	0.2	0.2	2.3	2.1	2.1	1.7	1	0.7	0.2	0.2	3.8	1.5	A	R	R	R	R	R	R	R	G	R	R	G	R	G
	Tdurum_contig22253_213	1B	78	547593908	NA	1.9	0.9	4.9	0.1	0.6	0.3	0.3	2.6	1.5	1	1.7	0.6	0.6	1.4	1.2	0.9	1	0.9	1.2	0.6	1.3	1.6	1.1	0.4	0.7	0.6	0.7	0.3	1.6	0.9	A	G	G	G	G	R	R	R	G	R	R	G	R	G
	BS00067627_51	1B	89	580537977	574375445	0.2	0.2	0.5	0	1.6	1.4	2.7	2.1	2.9	1.2	0.4	0.5	4.4	7.9	1.3	1.5	0.3	0.8	0.5	0.2	3	1.7	2.1	2	1	1.4	0.2	0	5.2	1.3	A	R	R	R	R	G	G	G	R	G	G	G	G	G
	RAC875_c1045_445	1B	79	548623397	540901513	1.5	0.6	0.8	0.1	0.3	0.5	1	4.2	3	1.6	1.1	0.7	2.9	4.7	1	1.8	1	1.5	1.4	0.4	2.5	1.5	1	2.2	0.6	1.2	0.1	0.1	2.7	1.2	R	R	R	R	R	A	A	A	R	A	A	R	A	R
	Tdurum_contig42749_3287	1B	79	548675661	540941630	0.4	0.1	2.8	0.4	0.9	0.7	1.1	3.5	1.9	0.6	0.3	0	1.8	4.7	1.1	1.6	0.7	0.9	0.5	0	1.5	1.3	1.4	1.6	0.9	1.1	0.3	0	2.6	0.9	A	A	A	A	A	G	G	G	A	G	G	A	G	A
	wsnp_JD_c6331_7499499	1B	79	548967406	541395759	1	0.4	0.9	0.6	0.6	0.8	0.8	4.3	3.2	1.3	1.4	0.4	2.7	4.6	0.7	1.9	1.3	1.4	1.8	0.3	2.3	1.7	0.8	2.3	0.8	1.2	0.2	0.2	2.5	1.4	R	R	R	R	R	G	G	G	R	G	G	R	G	R
1B.2	CAP12_c1085_283	1B	141	662021267	NA	1	0.3	0	2	1.6	0.6	0.6	1.9	1.8	0.4	1.2	0.3	1	1.5	0.8	3.6	3.4	1.2	1.2	2.1	1.3	2.2	0.9	1.8	4	1.1	0.2	2.4	1	1.8	M	A	A	A	A	A	M	A	A	A	A	A	A	A
2A.1	Tdurum_contig42153_6232	2A	35	NA	26933821	2.6	2.8	0.4	3	1.6	1.9	1.7	2.4	0.6	1.3	2	2.1	3.3	1.6	1.5	1.3	0.6	0.2	1.2	1	3.1	1.5	1.1	1.4	0.4	0.1	1	0.2	1.6	1	G	R	R	R	R	R	R	R	R	R	R	R	R	G
	Tdurum_contig42153_5854	2A	35	NA	26934199	2.6	3.4	0.6	3	2	2.6	2.8	3.5	1	2	2.5	2.1	3.7	1.7	2.6	2.2	1.2	0.5	1.5	1	3.3	1.7	1.9	1.4	0.5	0.4	1.1	0.2	1.7	1.3	A	M	M	M	M	M	M	M	M	M	M	M	M	A
	Kukri_c33779_1099	2A	37	31085656	30911616	1.4	1.5	0.5	0.1	0.4	0.9	2.2	3.2	1.4	2	1.1	2.7	2.2	1.3	1.5	2.2	1.1	0.7	0.5	1.5	2.4	1.4	1.4	1.5	0.9	0.5	0.2	0.4	1.2	0.9	A/C	A	A	A	M	A	M	M	M	M	M	M	M	C
	wsnp_CAP8_c2110_1147974	2A	53	30071760	29153155	1	1.5	1	2.6	1.6	0.9	2	2.1	0.6	1.3	2.6	3.3	1.4	1.8	1.5	2.5	1.3	0.3	1.8	1.7	1.7	2.9	1.7	3.7	2.2	0.2	2	0.4	0.7	2.2	A	G	G	G	G	G	G	G	G	G	G	G	G	A
2A.2	Tdurum_contig33419_124	2A	102	138188413	137717577	1.8	1.8	2.4	0.7	0.5	0.6	0.9	1.4	2.3	1.1	3.2	3.2	1.1	1.1	2	1.5	2.8	1	1.4	2.7	1	2.1	1.6	1.1	1.8	0.5	0.5	1.1	0.5	1.9	M/C	A	A	A	A	A	M	M	A	A	A	A	A	C
	Tdurum_contig33419_337	2A	102	138188626	137717790	1.7	2.1	1.3	0.1	0.1	1	0.8	1.3	2.6	1.3	2.6	3.9	1	0.5	1.6	1	3.3	1.3	1.2	3.4	1	1	1.2	1.2	2.4	0.9	0.4	1.6	0.6	0.7	R	A	A	A	A	A	A	A	A	A	R	A	A	R
	Tdurum_contig93152_81	2A	102	138876487	138354885	1.6	1.9	2.5	0.8	0.6	0.6	1	1.6	2.3	1.1	3.3	3.2	1.2	1.3	2.2	1.7	2.8	1	1.7	2.9	1.1	2.5	1.8	1.1	1.8	0.5	0.6	1.2	0.5	2.2	R/G	A	A	A	A	A	R	R	A	A	A	A	A	G
	Tdurum_contig10696_458	2A	102	141892793	140057797	1.8	2	1.6	0.9	0.9	1.1	0.9	1.2	2.4	0.8	3.2	2.4	1.2	0.7	2	1.4	3	0.9	1.3	2.6	0.9	1.5	1.7	1.2	2	0.5	0.5	1.2	0.3	1.2	A/M	C	C	C	C	C	M	M	C	C	M	C	C	M
	Tdurum_contig42331_2843	2A	102	141258657	NA	1.7	2.3	3	0.1	0	1	2.2	2.3	3.1	2.6	3.1	3.3	1.4	1	3.6	1.7	3.3	2	1.6	2.9	1.2	1.9	3	1.6	2.3	1.1	0.8	1.4	0.6	1.7	R	A	A	A	A	A	A	A	A	A	R	A	A	R
	Excalibur_c6027_1035	2A	102	141270314	NA	1.9	2.3	2.6	0.7	0.4	1	1.4	1.6	3	1.6	3.4	2.6	1.9	0.8	2.7	2.1	3.3	1.5	1.5	2.3	1.7	1.9	2.2	1.9	2.1	0.8	0.6	0.9	0.7	1.6	A/R	G	G	G	G	G	R	A	G	G	R	G	G	R
2A.3	wsnp_Ra_c10658_17500498	2A	155	712554131	NA	0.2	2.4	3.3	4.7	1.8	0.6	3.9	2.3	1.5	1.8	0.3	0.3	0.1	1.9	1.6	0.6	0.3	0.1	0.1	0.9	0.7	1.1	2.6	0.7	0.6	0.3	0.7	0.7	1.2	1.7	G	G	G	G	G	G	R	R	R	R	R	R	R	R
2A.4	RAC875_c75800_331	2A	207	768998543	NA	0.2	1.2	0.7	1.5	4	1.3	1.8	2.4	1.8	2.6	2.6	0.3	3.4	3.5	2.3	1.7	2.5	1.3	2.4	0.6	3.5	3.3	2.6	1.5	1.9	1.3	0.7	0.2	2.8	3.2	G	A	A	A	A	A	A	A	G	A	A	A	A	A
	RAC875_c35873_1828	2A	211	762289297	NA	1.6	1.9	0.4	1.3	1.2	1.9	2.7	1.1	1.7	0.7	0.6	0.8	1.4	5.2	1.6	0.1	0.2	0.2	0.5	0.4	1.3	1.1	2.1	1.1	0.6	0.8	1.3	0.3	3.4	1.8	G	A	A	A	R	A	R	R	A	A	R	R	R	R
	RFL_Contig4560_1077	2A	211	764323299	NA	1.8	2.2	0.8	1.1	1.6	2.1	0.9	1.8	0.7	1.9	0.4	0.3	2.9	3.8	1.6	1.4	0.6	0.3	0.3	0	2.7	2.1	2	2.1	0.5	0.3	0.9	0.3	3.8	2.6	A/G	R	R	R	R	R	G	G	R	G	G	G	G	G
	Tdurum_contig45787_512	2A	210	766566174	771308796	0.5	0.2	0.1	1.6	3.9	1.8	1	1.5	0.9	0.6	2.3	0.3	1	0.7	1.2	1.2	2	0.1	1.8	1.1	1.7	1.4	1.2	0.7	2	0.1	0.7	1.2	1.8	1	M	M	M	M	A	M	A	A	M	A	A	A	A	A
2B.1	BS00028167_51	2B	3	8011652	3418896	3	2.6	4.3	0.6	1.6	1.7	1.8	3.8	2	0.3	0.7	0.1	1.4	6	2	0.7	0.4	0.5	0.5	0.3	1.8	2.6	2.7	0.9	0	1.1	1	0.2	3.5	2.6	R	A	G	A	A	A	G	G	G	G	G	G	G	G
	BS00086125_51	2B	12	17433460	16236236	0.8	2.5	0.9	2	3	0.1	0	4.1	1.2	0.7	1.9	2.7	3.6	0.5	0.1	3.1	1.7	0.3	1.7	1.2	2.1	1.8	0.1	2	1.2	0.2	0.7	0.1	0.2	1.5	R	A	G	A	A	A	G	G	G	G	G	G	G	R
	Excalibur_c30167_531	2B	12	17780814	NA	1.7	2.4	0.5	2.7	2.7	0	0.4	3	0.8	0.2	1.6	2.8	3.3	0.6	0.5	2.4	1.2	0.2	1.4	1.3	2.3	1.7	0.4	1.3	1	0.3	1	0.2	0.6	1.3	G	R	R	R	R	R	R	R	R	R	R	R	R	G
	Tdurum_contig15440_616	2B	17	21938998	21617081	0.6	2.5	1.1	3.2	3.2	0.3	0.4	4.3	1.2	1	1.9	2.6	3.5	0.6	0.3	3.7	1.7	0.3	1.8	1.3	2.1	1.7	0.3	2.2	1.2	0.2	0.6	0.4	0.2	1.4	R	G	R	G	G	G	R	R	R	R	R	R	R	A
2B.2	JD_c11869_1300	2B	59	91837821	NA	0	0.8	0.8	0.7	1.7	1.6	3.3	2.1	2.9	0.7	0.9	0.2	4.7	8.1	2.2	1.2	0.4	0.6	1	0.7	3.5	1.8	3.2	2.2	1	1.2	0.3	0.7	5.5	1.5	M/C	A	A	A	C	A	C	C	C	C	C	C	C	C
2B.3	BS00025649_51	2B	147	716780326	NA	0.4	1.5	3.3	0.4	0.9	1.8	2.3	2.2	0.7	1.8	1.8	0.9	1.6	2.6	2.4	1.6	0.7	1.6	1.8	0.9	1.9	1	2.3	1.8	0.4	1	1	0.4	1.6	0.9	A	A	A	A	A	A	M	A	A	A	A	M	M	M
	Excalibur_c4372_262	2B	172	770680110	NA	0.3	0.6	0.6	1.3	1.3	1.2	0.9	3	2	1.5	1.4	1.4	0.3	0.7	2.2	1.4	1.6	0.7	0.6	0.8	0.5	1.1	2	1.1	0.9	0.3	1.7	0.4	0.6	0.8	G	G	G	G	R	G	R	R	G	R	R	G	R	G
	Excalibur_c20417_743	2B	176	780869054	NA	0.8	0.7	0.5	0.1	0.3	0.1	3.1	1.5	1.8	1	0.7	0.2	0.5	1.9	2.5	0.5	1.4	0.2	0.2	0.4	1	2.8	3.1	0.5	1.9	0.2	0.1	0.2	1.2	3.3	R	A	R	R	A	A	A	R	A	A	A	A	A	A
3A.1	BS00017635_51	3A	9	13033703	NA	0.5	0.2	0	0.7	1.7	1.4	0.2	0.2	1.7	2.1	1.4	0.1	0.3	0.3	0.7	1.6	3.3	1.3	1.7	0.9	0.8	1.4	0.7	2.1	2.5	1.1	1.1	2	1.2	1.4	R	G	G	G	G	G	G	G	G	G	G	G	G	R
	BobWhite_c36118_246	3A	7	9612111	NA	0.4	0.7	1.2	0.3	0.3	2.2	4.1	0.8	0.8	2.2	0.4	0.1	1.3	2.6	3.2	0.5	0.1	1.5	0.6	0.1	1.2	1	3.6	0.6	0.1	1.5	0.2	0	1.6	1.3	R	A	A	A	A	R	A	R	A	A	A	R	A	A
	Kukri_rep_c101018_395	3A	7	10245922	NA	1.6	0.3	2.9	0.6	0.4	2.1	6.2	1.5	1.3	1.4	0.5	0.5	4.6	5.4	4.6	0.7	0.2	0.5	0.8	0.4	2.9	2	4.6	0.5	0.1	0.3	1.3	0.1	3.2	2.4	A	C	C	C	C	M	M	M	C	C	C	M	M	C
	BobWhite_c2453_460	3A	7	NA	NA	0.6	0.3	1.4	0	0.3	2	3.6	0.8	0.6	1.7	0.7	0.4	1.1	2.2	3.2	0.8	0.2	1.4	0.9	0.7	1.2	1.2	3.4	0.9	0.3	1.7	0.5	0.5	1.4	1.5	A	G	G	G	G	A	R	A	G	G	G	A	A	G
3A.2	Tdurum_contig12558_205	3A	78	512032545	NA	0.3	0.3	0.6	3.8	4.5	1.3	0.2	1.1	0.7	1	2.8	0.5	1.3	0.3	0.4	0.7	1.4	0.5	3.7	0.6	1.5	0.7	0.2	0.8	1.3	0.6	1.8	0.2	1.3	0.8	G/R	G	R	A	A	A	A	A	G	A	A	A	A	G
	IAAV2383	3A	84	NA	NA	0.6	0.8	0.4	0.2	1.7	2.6	4.1	2	1.6	0.6	0.5	0.8	2.5	4.8	2.3	1.4	0.2	0.1	0.5	0.7	2.3	4	2.6	1	0	0.3	1.3	0.3	2.8	3.9	R	R	R	G	G	R	G	G	G	G	G	G	G	G
3B.1	Tdurum_contig84762_189	3B	3	3665571	3900658	1.4	0.8	4	0.9	1.4	2.3	4.1	3.2	2.9	2.5	0.8	0.1	3.1	8.1	3.4	1.1	1.8	0.8	0.5	0.2	3.2	2.7	3.5	1.1	1.4	0.6	0.5	0.3	4.5	2.6	G	G	G	G	G	G	G	G	G	G	G	A	G	G
3B.2	BS00079522_51	3B	10	9778361	11487450	1	0.8	1.2	0.7	0.4	0.8	1.6	0.4	1.1	3.2	1.4	0.2	0.6	0.2	1.7	1.6	1.5	0.8	1.5	1.1	0.6	0.6	1.8	0.8	0.5	0	0.2	2	0.2	0.6	R/A	A	A	A	A	A	A	A	A	A	A	A	A	G
3B.3	IAAV51	3B	65	140686794	147684141	0	1.4	2.2	4.5	3.5	2.9	2.5	2.3	1.1	2.1	2.5	0.1	3.8	1.6	1.9	2.9	0.9	1.4	3.2	0.1	3.7	1.8	2	2.3	0.6	1.2	2.3	0	2.5	1.7	A	A	A	A	A	A	A	A	A	A	A	A	A	A
	wsnp_JD_c7325_8422075	3B	65	NA	147685929	0	1.4	2.2	4.5	3.5	2.9	2.5	2.3	1.1	2.1	2.5	0.1	3.8	1.6	1.9	2.9	0.9	1.4	3.2	0.1	3.7	1.8	2	2.3	0.6	1.2	2.3	0	2.5	1.7	A	A	A	A	A	A	A	A	A	A	A	A	A	A
	Tdurum_contig45431_607	3B	65	NA	147685996	0	1.4	2.2	4.5	3.5	2.9	2.5	2.3	1.1	2.1	2.5	0.1	3.8	1.6	1.9	2.9	0.9	1.4	3.2	0.1	3.7	1.8	2	2.3	0.6	1.2	2.3	0	2.5	1.7	A	A	A	A	A	A	A	A	A	A	A	A	A	A
	Kukri_c2074_739	3B	76	232564805	238807649	0.9	0	0.1	2.2	2.8	0.6	3	0.5	1.7	2.4	1.5	0.4	0.7	1.8	2.5	2.6	1.5	1.2	1.2	0.2	0.6	2.4	2.6	2.6	0.8	1.8	0.7	0.3	0.6	2.3	R	G	G	G	G	G	G	G	G	G	G	G	G	G
4A.1	Tdurum_contig19920_463	4A	134	659014917	663810542	1.7	0.9	4.9	0.2	1.7	1.5	0.2	3.4	1	0.6	0.6	0.7	0.2	1.5	1.1	0.8	0.7	0.6	0.1	0.8	0.9	1.8	1.1	0.5	0.5	0.5	1	0.7	1.5	1.1	G	G	G	G	G	G	G	G	G	R	R	R	G	R
	Tdurum_contig10654_704	4A	163	732512147	NA	0.4	0.1	0.1	3.5	2.8	1.5	0.6	1.2	1.5	0.3	1.2	0.9	1.4	3.6	0.3	0.6	1.2	0.5	0.8	0.8	1	1.8	0.3	1.2	0.7	0.5	0.4	0.2	2	1.8	G	G	G	G	G	G	G	R	G	G	G	G	G	G
	Tdurum_contig42638_383	4A	169	737382596	NA	1.6	0.5	0.8	1.4	2.9	3.3	4.5	3	3.8	0.9	1	0.1	5.5	11.8	2.1	1	1.5	0.6	0.8	0.2	3.8	3	3.4	2.2	1.6	1.6	1.6	0.4	7.2	3.3	A	A	M	M	M	A	M	M	A	M	M	A	M	M
4B.1	RAC875_c78248_115	4B	0		NA	0.9	1.5	0.4	0.7	1	1.3	2.5	4	0.6	4.3	0.3	2	3.2	2	2.4	1.9	0.3	2.3	0.3	1	2.8	3.3	1.7	1.5	0.3	1.3	0.5	0.6	1.8	3.4	R	G	G	G	G	G	G	G	G	G	G	G	G	A
	tplb0025f09_1052	4B	3	4851245	4947809	1.4	3.1	0.9	0.5	0.1	0.2	0	1.6	1.1	0.3	1.1	1.4	1.4	0.8	0.6	1.7	0.6	0.1	0.8	1.2	1.7	1.2	1.1	1.6	0.5	0.1	0.5	0.5	1.7	1.1	R	A	A	R	R	A	R	A	R	A	R	A	A	R
4B.2	Kukri_c27822_55	4B	51	NA	197219498	0.1	1.4	0.6	0.3	0.5	0.3	1.1	1.7	3.7	1.2	0.7	0.2	1.5	1.9	0.5	0.9	2.2	1.3	0.7	0.1	1.5	2.5	0.5	1	1.5	1.2	1.5	0	0.8	2.6	R	R	A	R	R	A	A	A	A	A	A	A	A	A
	Kukri_c66171_54	4B	51	274678038	346720061	0.4	1.5	0.3	0.1	0.6	0.3	1.3	1.9	3.7	1.2	0.7	0.2	1.8	1.9	0.5	0.9	2.2	1.4	0.7	0.1	1.8	2.6	0.6	1	1.6	1.3	2	0.1	1.1	2.7	R	R	G	R	R	G	G	G	G	G	G	G	G	G
4B.3	Ku_c2885_1189	4B	136	672937081	674166079	0	0.5	1.9	2.7	0.7	0.9	0.7	1.8	1.6	2.1	2.1	2.3	1.6	1.3	1.7	1.1	1.8	1.9	2.2	2.1	1.9	3.1	1.8	1.6	1.9	1.1	2	1.4	1.3	2.7	R	A	A	A	A	A	A	A	A	R	A	R	A	R
	Ku_c2885_1277	4B	136	672936993	674166167	0.1	0.3	2	2.2	0.7	1	0.7	1.7	1.5	2	2.1	2	1.3	1.5	1.9	1.2	1.6	2.1	2	2.3	1.4	3.1	2.1	1.5	1.6	1.3	1.7	1.7	1	2.8	R	A	A	A	A	A	A	A	A	R	A	R	A	R
	Ku_c2885_1286	4B	136	672936984	674166176	0.1	0.3	2	2.2	0.7	1	0.7	1.7	1.5	2	2.1	2	1.3	1.5	1.9	1.2	1.6	2.1	2	2.3	1.4	3.1	2.1	1.5	1.6	1.3	1.7	1.7	1	2.8	R	A	A	A	A	A	A	A	A	R	A	R	A	R
	D_GBQ4KXB01B0XFC_371	4B	136	NA	NA	0	0.4	2	2.5	0.6	0.5	0.9	2.2	2	2.1	3.1	3.1	2	2	1.6	1.8	2.4	2.2	3	3.1	2.6	4.2	1.8	2.5	2.7	1.4	3.2	2.2	1.8	3.8	R	A	A	A	A	A	A	A	A	R	A	R	A	R
	RFL_Contig3368_209	4B	136	672926638	NA	0.4	0.2	1.3	2.2	0.5	1.8	1.5	2.5	2.3	2.2	2.5	2.2	2	3	2.3	1.3	1.8	1.7	2.5	2.3	2.1	3.6	2.4	1.2	1.4	1	1.3	1.4	1.3	3.2	M	C	C	A	C	C	C	C	C	M	C	M	C	M
5A.1	Tdurum_contig81424_367	5A	143	585020754	546754457	0.4	0.6	0.4	1.7	1.1	0.5	0.3	1.3	1.4	1.2	2.6	2.7	0.5	0.3	1.1	1.9	1.5	0.8	3.5	1.7	1.1	0.3	1	2.2	1.1	0.9	2.1	0.6	0.8	0.2	A	A	A	A	A	A	A	A	A	A	R	A	A	A
	wsnp_Ex_c621_1231298	5A	147	591155904	552863169	0.7	0.5	0.3	0.2	0.7	0.2	1.4	0.9	1.6	2.3	2.9	0.6	0.6	0.8	1.8	0.7	1.5	0.4	3	1.3	0.7	0.8	1.7	0.6	1.1	0.3	2.2	1.2	0.4	0.7	G	G	R	R	G	R	G	G	G	G	R	G	G	G
	BS00041063_51	5A	147	594960125	556583673	1.3	0.4	0.1	0	0.3	0.3	3.8	1.2	2	4.3	1.1	0.5	0.3	0.9	3.5	1.2	1.5	1.5	1	0.4	0.5	0.9	3.6	1.7	1.3	1.3	1.5	0.6	0.5	1	R	R	A	A	R	A	R	A	A	R	A	A	A	A
5B.1	BS00067701_51	5B	16	19458948	NA	0.2	1.5	4.6	1	0.9	2	6.6	2.8	2.1	5.2	0.8	1	1.1	2.6	4.2	1	0.6	2.5	0.9	1	1.3	1.4	5	0.7	0.1	1.4	1.6	0.4	1.3	1.5	M	A	A	A	A	A	A	A	A	A	A	A	A	A
5B.2	IACX5702	5B	126	577227941	574041428	1.5	2.1	0.7	0.9	1.4	0.4	0.5	3.8	2.1	0.3	0.9	3.1	1.4	0.6	1.5	1.8	1.4	0	0.4	2.5	1.7	1.1	1.1	0.7	1.1	0.1	1.2	1.5	1	0.7	R	R	G	G	R	R	R	G	R	R	R	R	R	R
	BS00033182_51	5B	188	691129115	NA	1	1.2	1.3	0.1	0.5	0.7	1.2	2.8	1.7	1.3	1.2	0.8	2.9	3.7	0.6	2.1	0.2	0.1	2.1	0.5	2.5	1.7	0.4	1.1	0	0.1	1.8	0.1	2.8	1.5	A	A	G	A	A	A	G	G	A	G	G	G	G	A
6A.1	BobWhite_c15802_72	6A	6	12391636	6B	0.7	1.3	0.2	0.3	1.3	1.3	2.7	2.4	3.2	0.6	1	0.6	5.8	6.3	1.2	2.6	1.2	0.2	0.6	0.5	3.8	1.6	1.5	2.9	0.8	0.5	0.5	0.2	4	1.6	G	G	A	G	G	A	G	A	A	G	G	A	A	G
	Ku_c12058_2246	6A	13	22818800	6A	1.2	0.3	1.4	0.4	0.9	0.5	2.2	0.6	0.8	0.5	1.6	0.3	0.9	1.5	2.2	2.5	2.1	0.3	0.8	0.9	1	3.1	1.9	2.8	2.5	0.1	0.9	1.4	0.8	3	R	R	R	R	R	R	R	R	R	R	A	R	R	R
	RAC875_c19240_168	6A	13	18712635	6B	0.4	0.2	0.6	0.5	1.5	0.6	1.9	0.8	0.9	0.5	1.4	0.1	0.3	1.8	2.4	2.5	2.4	0.1	0.6	0.6	0.9	3.4	2.1	3.3	2.9	0.3	0.9	1.5	1.2	3.4	R	R	R	R	R	R	R	R	G	R	R	R	R	R
	Jagger_c3477_441	6A	13	NA	NA	0.1	0.1	0.7	0.3	1.1	0.6	1.8	0.3	0.4	0.1	2.4	0.2	0.3	1.6	1.8	2.1	1.7	0	1.4	0.9	0.8	2.5	1.6	3.1	2.2	0.2	1.4	2.2	1.1	2.6	A	A	A	A	A	A	A	A	A	A	A	A	A	A
6A.2	BS00105965_51	6A	119	603136547	NA	1.7	1.8	2.1	0.6	0.9	0.7	4.1	2.7	1.6	1	0.1	0.1	5.2	6.4	2.2	1	0.3	1.1	0.2	0.1	2.6	2.9	2.6	0.8	0.3	0.8	0.3	0.1	2.1	3.2	G	A	A	A	A	A	A	A	G	G	A	G	G	A
	Excalibur_c7002_314	6A	118	601472919	NA	0.4	0.2	0.9	0.1	0.5	0.2	1.1	0.4	0.3	1.7	0.4	0.6	0.1	1.3	1.9	0.9	0.7	3.8	1	0.8	0.9	2.4	2	1.5	0.8	3.3	1.6	1.5	1.9	2.7	A	A	A	A	A	A	A	A	A	A	A	A	A	A
	Excalibur_c54765_156	6A	127	611577310	NA	1.1	0.6	1.9	1	1.1	2.5	1	3.5	1.1	1.2	0.8	1.3	0.7	4.3	1.9	1.2	1.1	0.8	1	0.4	0.8	2.5	2.4	1.8	1.3	0.7	1.4	0	1.4	2.4	A	G	G	A	G	A	G	G	G	G	G	G	G	G
	Kukri_rep_c103067_248	6A	130	615587698	NA	0	1	1	0.9	0.3	0	2.3	1.6	3	1.8	0.6	0.1	3.5	3.5	1.8	1	2.2	1.2	0.3	0.2	2.3	3.7	2.5	0.6	2.6	1	1.7	0.4	1.4	4.2	R	G	G	G	G	G	G	G	G	G	G	G	G	G
6B.1	Excalibur_c51068_220	6B	135	694127389	NA	1.8	1.8	1.9	0.5	0.2	0.4	4	3	1.3	2.2	0	0.3	2.7	4.1	2.5	1	0.2	2.5	0.2	0.1	1.2	1.1	2.5	0.5	0.5	1.1	0.1	0.1	1	0.9	A	G	G	A	G	A	G	G	G	G	G	G	G	G
	RAC875_c17347_312	6B	134	NA	NA	1.7	1.6	1.8	0.8	0.2	0.1	3.3	2.5	1	1.6	0.3	0.1	2.1	3.8	1.9	1	0.3	1.9	0.4	0	0.8	0.9	1.9	0.2	0.2	0.9	0	0.2	1.5	0.7	R	G	G	R	G	R	G	G	G	G	G	G	G	G
	BobWhite_c35035_317	6B	140	701387273	677436832	1.4	1.1	0.1	0.1	0.1	0.4	2.6	1.4	1.4	2.3	0.4	0.1	2.9	3.8	2.2	0.3	0.4	0.4	0.4	0.1	1.9	0.6	2	0.2	0.2	0.4	0.2	0.2	2.3	0.5	G	A	A	A	A	A	A	A	A	A	A	A	A	A
	BS00034339_51	6B	145	705645598	NA	0.6	1.8	0.1	0.3	0.1	0	1.6	1.2	1.2	2	0	0.2	2.9	3.3	0.8	0.4	0	0.8	0	0	1.6	0.6	1	0.6	0	0.4	0.1	0	1.5	0.8	A	G	R	R	R	R	G	G	G	G	G	G	G	G
	RAC875_rep_c113337_153	6B	146	706528524	NA	0.2	1.7	0.3	0.2	0.8	0.8	1.6	0.9	0.9	1.8	0.1	0.3	5	3.6	1.2	0.3	0.2	0.3	0.1	0.1	3.5	0.4	1.6	0.4	0.8	0.1	0.2	0	4	0.3	A/G	R	G	G	G	G	R	R	R	R	R	R	R	R
7A.1	Tdurum_contig31852_251	7A	1	7514472	NA	0.3	0.5	0.8	0.6	0.9	2.2	1.4	2	3.7	1.3	1.4	1.4	2.3	4.5	0.8	1.6	2.1	0.6	1.5	1.1	1.2	2	1.2	1.1	1.3	0.1	0.3	0.3	1.6	1.9	A/C	M	C	A	C	M	A	A	M	M	M	M	M	M
	Excalibur_rep_c101421_191	7A	1	.	NA	0.2	0.2	0	0	0.5	1.7	1.8	0.2	1.7	0.5	0	1.3	2.1	3.8	0.6	0.2	0.2	0	0.2	0.7	0.8	0.3	0.8	0.2	0.1	0.1	0.4	0	1.1	0.3	A/G	R	G	R	G	R	A	A	R	R	R	R	R	R
	Kukri_c18677_823	7A	5	12911298	NA	2	0.3	0.2	1.5	1.2	0.9	4.4	0.6	1.6	2.7	0.2	0.3	1.3	2.2	3.6	0.9	0.9	1.2	0.4	0.1	1.9	1.2	4	1.4	0.2	1.8	1	0.1	2.7	1.4	R	A	A	A	A	A	A	A	A	A	A	A	A	A
	RAC875_c11969_384	7A	6	.	NA	0.2	0.2	0.6	1.8	1.8	3.1	1.3	1.5	2.2	0	0.4	0.8	2.7	5.5	0.3	0.3	0.5	0.2	0.3	0.2	1.4	0.8	0.6	0.5	0.3	0.5	0.5	0.1	2.3	0.8	A/C	M	M	M	A	M	M	M	M	M	M	M	M	M
7A.2	BS00040601_51	7A	85	102058757	NA	0.2	2.1	2.6	0	0.2	1.2	0.7	3.3	3.7	2.7	0.9	0.6	1.9	3.4	0.7	1.6	1.2	1.3	0.5	0.4	2	2.1	0.7	1	0.3	0.2	0.6	0	1.4	1.9	A	C	A	A	A	C	C	C	C	C	C	C	C	C
	Tdurum_contig16839_284	7A	90	112927827	NA	1.5	1.8	1.9	1.1	0.3	1.4	5.1	2.3	2.6	2.1	0.7	0.5	5.4	5.2	4.7	0.6	0.5	0.9	0.5	0	4.5	2.8	5	0.5	0	0.3	0.4	0	3.8	3.4	R	G	R	R	R	G	G	G	G	R	G	G	G	G
	Excalibur_c48693_186	7A	91	117346244	113936997	0	1.6	0.6	0.6	0	0.4	0.5	1.7	0.8	1.4	0.7	0.3	3.4	1.5	0.8	0.9	0.6	1	0.5	0.4	3.4	1.5	0.4	0.6	0.4	0.6	0.8	0.7	2	1.3	R	G	R	R	R	G	G	G	G	R	G	G	G	G
	BS00040600_51	7A	85	102058750	99370164	0.2	2.1	2.6	0	0.2	1.2	0.7	3.3	3.7	2.7	0.9	0.6	1.9	3.4	0.7	1.6	1.2	1.3	0.5	0.4	2	2.1	0.7	1	0.3	0.2	0.6	0	1.4	1.9	C	A	C	C	C	A	A	A	A	A	A	A	A	A
7A.3	Kukri_c64387_191	7A	159	670766595	NA	0.2	0.3	0.2	0.5	0.3	0.2	3.9	0.6	1.8	2.7	0.7	0.2	2.1	1.7	3	1.9	1.8	0.8	1.1	0.4	2.3	0.4	3	1.9	2.5	0.3	0.8	0.5	2	0.4	A	A	A	M	A	M	M	M	M	M	M	M	M	M
7B.1	RAC875_c27548_417	7B	127	NA	609951700	0.2	1.1	2.5	0.9	1.6	1.3	1.2	3.5	2.5	2.1	0.8	1.5	1.3	1	1.6	2	2.6	1.2	0.4	1.2	1.2	1.6	1.7	1.2	2	1.1	0.5	0.6	0.5	1.4	C	C	C	C	C	C	C	A	A	C	C	A	A	A
	Excalibur_c373_1347	7B	131	NA	622817820	0.2	0.1	0.2	0.4	0.9	1.1	5.2	0.7	1.3	3.6	0.9	0.6	1.9	4.7	4	0.9	2.3	1.4	1	1.7	1.5	1.8	4	0.7	2.9	2.1	0.1	1.1	1.6	1.6	R	G	G	G	G	G	G	G	G	G	G	G	G	G
	Tdurum_contig14821_751	7B	141	662675410	645996187	1.7	1.3	6	0.1	0.6	0.3	1.1	4	1.7	2	0.9	0.6	2.3	2.2	2	1.6	0.5	0.5	0.3	0.5	1.9	1.8	2.1	0.7	0.2	0.3	0.6	0.3	1.7	1.2	R	G	G	G	G	G	G	G	G	G	G	G	G	G
[truncated: 173 more columns]
