# Supplementary material for: Characterization of the Genetic Architecture for Fusarium Head Blight Resistance in Durum Wheat: The Complex Association of Resistance, Flowering Time, and Height Genes
Source: Front Plant Sci. 2020 Dec 23;11:592064. doi: 10.3389/fpls.2020.592064 (PMC7786293; doi:10.3389/fpls.2020.592064)
Supplement: Supplementary file 3 [file Table_3.XLSX]

## Sheet: Table S4
Table S4 Allele haplotypes of Fhb1 QTL with pedigree information and allele types, three haplotypes, tNative (A), tEmmer (G) and tSumai 3 (R) were defined for Fhb1.
Lines	Pedigree	BS00079522_51	Allele Haplotypes
A0580-D12L03	DT696/A0200H-056/3/Langdon-Dic3A//SC9475-CX1*2/ND2710 (SEED FROM JULIAN THOMAS)	A	tNative
TG3487	BGRC3487	A
A0512-JC01C	A0040-DW02/A9927-HE4D//DT776	A
A0308-NM02B	DT722/G9574-AZ3E//9767A-124E	A
A0022&C287	Strongfield/Blackbird	A
A0022&C555	Strongfield/Blackbird	A
A0022&D284	Strongfield/Blackbird	A
A0022&D368	Strongfield/Blackbird	A
A0022&D481	Strongfield/Blackbird	A
A0318-FD*04	A9805-DG*2/9689C-AH4A	A
A0434-ER01	DT746/DT749	A
A0465&AG014	SACHEM/STRONGFIELD	A
A0509&AB054	DT771/STRONGFIELD	A
A0520-HD04	DT783/A0132&AX052	A
A0580-D13D04	DT696/A0200H-056/3/Langdon-Dic3A//SC9475-CX1*2/ND2710 (SEED FROM JULIAN THOMAS)	A
A0611&AB009	A0132&CE054/STRONGFIELD	A
A1200H-002	FHB SEED HABER (row k158)	A
A1200H-003	FHB SEED HABER (row k158)	A
A1200H-005	FHB SEED HABER (row k158)	A
A1200J-101	FHB SEED HABER (row k109)	A
A1200J-102	FHB SEED HABER (row k109)	A
A1200J-103	FHB SEED HABER (row k109)	A
A1200J-104	FHB SEED HABER (row k109)	A
A1200K-208	FHB SEED HABER (row K114)	A
A1200K-209	FHB SEED HABER (row K114)	A
Brigade	DT513/9366-BS*1	A
CDC Desire	D40-2237/DT712	A
CDC Carbide	DT712/DT780	A
CDC Dynamic	CDC Verona/DT742//Strongfield	A
CDC Credence	DT712/DT763//DT773	A
AC Avonlea	SC8267-AD2A/D84065	A
AC Navigator	Kyle/Westbred 881	A
DT707	8774-CR3A/8982-TB04	A
AAC Current	9667B-AA4/DT704//Strongfield	A
AAC Raymore	9675-AP2/DT732//Strongfield [Double Haploid]	A
AAC Durafield	A9822-LH1/DT735//DT712	A
AAC Marchwell	A0039&DB764D18/Strongfield	A
AAC Cabri	A9918-LX2B/Strongfield	A
DT855	DT789/DT790	A
AAC Congress	DT789/DT790	A
DT857	DT789/DT790	A
DT858	A0400E-060/A0267&AA009//DT805	A
DT859	DT789/DT790	A
DT861	DT805/DT795	A
AAC Stronghold	DT805/DT795	A
DT863	A0138-CQ01/DT812	A
DT866	DT776/A0215-CY02	A
DT867	DT787/DT776//DT814	A
DT870	A0302&AJ060/DT801//DT787	A
DT873	DT814/DT794//DT809	A
Strongfield	8774-CR3A/8982-TB04	A
Transcend	DT707/DT696 [DOUBLE HAPLOID]	A
DT802	DT707/DT696 [Double Haploid]	A
A0132&BR021	DT707/DT696 [Double Haploid]	A
A0132&CB019	DT707/DT696 [Double Haploid]	A
A0132&CE054	DT707/DT696 [Double Haploid]	A
A0518-HQ05	A0132&BR021/DT778	A
A0611-DZ03	A0132&CE054/STRONGFIELD	A
A0820-NZ07	A0302&AJ060/DT801//DT787	A
A0928-AX02	A0508&AC038/A0457-EB04//Strongfield	A
A0935-KN04	Eurostar/DT809	A
Blackbird		A
Flora-10	T.dicoccum-161/Floradur*2	A
I19-94-1	Helidur/T.dicoccoides_Mt.Gerizim#36/Helidur	A
P32x51	DBC-480-1/Durobonus	A
P33x26	DBC-480-1/Durobonus	A
D04X.84.030	BGRC3487/2*DT735	A
D04X.84.088	BGRC3487/2*DT735	A
A1125-DW04	DT809/DT561//TRANSCEND	A
A0709-CT01	A0262&AM050/STRONGFIELD	A
A1400C-016	Pai Toborochi / PI 94725 F2	A
DT874	DT801/DT776//A0308-EA01E	A
DT876	DT817/A0361&AE007//A0215-CY02	A
DT877	A0345&BE010/DT809	A
AAC Grainland	A0463&AP018/DT801	A
A0922-BQ06	A0345&BE010/DT833//DT809	A
DT879	A0423-MG01/A0580-D12L03//DT809	A
DT880	DT801/DT809	A
A0937-JA01	DT829/DT809	A
A1005-PR06	DT829/DT833//DT801	A
A1024-LP01	DT813/DT809//DT838	A
A1133-GD03	A0463&AV013/A0537-AG03//DT809	A
A1133-GD07	A0463&AV013/A0537-AG03//DT809	A
A1133-HD06	A0463&AV013/A0537-AG03//DT809	A
A1133-LC02	A0463&AV013/A0537-AG03//DT809	A
A1133-LC03	A0463&AV013/A0537-AG03//DT809	A
A1150-DAP05	A0262&AM050/A0434-ER01//A0537-AG03/A0463&AV013	A
A1150-DBB03	A0262&AM050/A0434-ER01//A0537-AG03/A0463&AV013	A
A0709-BX05	A0262&AM050/STRONGFIELD	A
CDC Vivid	DT529/9468-DQ*3//DT712	A
DT803	9661-AF1D/9586-CL5A//Strongfield	A
DT809	A9900H-069/Strongfield//Strongfield	A
DT837	A9821-JL5/DT732//DT726	A
DT839	DT749/DT712	A
DT845	DT769/DT751	A
Enterprise	9488C-CK2/Strongfield	A
Eurostar	G9575B-AA09C/DT498//DT691	A
Kahla		A
Kahla47		A
Kyle	6962-92-8-5/6965-494-1	A
Lakota		A
A0527-BN03	A9927-MV5C/DT779//DT776	A
A0433-GW05	A0042-MF03/DT749	A
A0453-AX01	A0200G-063/Strongfield//DT749	A
A0308-QE02A	DT722/G9574-AZ3E//9767A-124E	A
A1400C-017	(Edmore/Plac 1485) F3	A
CDC Fortitude	CDC Verona/DT732	A
CDC Precision	DT540 (Verona) /DT724//A9909-JC3B (DT765)	A
CDC Alloy	Strongfield/Brigade	A
DT696	DT618/DT637//KYLE	A
AAC Spitfire	SACHEM/STRONGFIELD//DT757	A
DT864	A0138-CQ01/DT812	A
DT868	DT787/DT776//DT814	A
DT869	A0302&AJ060/DT801//DT787	A
DT871	DT814/DT794//DT809	A
DT872	DT814/DT794//DT809	A
A0518-AD03	A0132&BR021/DT778	A
DT865	DT814/DT794//DT809	A
Heli-64-7	T.dicoccum-161/Helidur*2	A
A1400C-002	Vernal/94 SM-768//EdmoreF2	A
A1400C-026	Maringa/PI 94725//EdmoreF2	A
CDC Verona	D95253/D95116	A
DT812	DT721/Commander//DT720	A
DT814	9589-DK5D/9667B-AA3//DT720	A
DT848	DT769/DT751	A
DT849	DT769/DT751	A
A0527-CF02	A9927-MV5C/DT779//DT776	A
A0506&AH021	DT769/DT751	A
A0506&AJ039	DT769/DT751	A
A0517-FT02	DT778/A0048-PV05	A
Heli-106-9	T.dicoccum-161/Helidur*2	G	TEmmer
I17-90-1	Helidur/T.dicoccoides_Mt.Hermon#22/Helidur	G
P49x57	DBC-480-1/SZD1029K	G
A0580-D53H02	DT696/A0200H-056/3/Langdon-Dic3A//SC9475-CX1*2/ND2710 (SEED FROM JULIAN THOMAS)	G
P17x29	DBC-480-1/Karur	G
P17x54	DBC-480-1/Karur	G
R11x28x1	Heli94/Karur//SZD1029K/DBC-480-1	G
R11x44x1	Heli94/Karur//SZD1029K/DBC-480-1	G
A1400C-029	Edmore / PI 94725 F2	G
DT875	DT801/DT776//A0308-EA01E	G
CAPAROI	LY2.6.3/930054	G
HYPERNO	Kalka/Tamaroi	G
SAINTLY	Tamaroi/WLYY9//WLYY96a1773	G
Flora-66-2	T.dicoccum-161/Floradur*2	G
Flora-6-11	T.dicoccum-161/Floradur*2	G
Heli-52-5	T.dicoccum-161/Helidur*2	G
Heli-73	T.dicoccum-161/Helidur*2	G
I18-14-1	T.dicoccoides_Mt.Hermon#22/Helidur*2	G
Heli94	T.dicoccum-161/Helidur*2	G
R14x4x1	SZD1029K/I19-94-1//DBC-480-1/Karur	G
R2x46x1	Heli94/Karur//SZD1029K/DBC-480-1	G
R7x61x1	I19-94-1/Durobonus//SZD1029K/Heli94	G
Heli-7	T.dicoccum-161/Helidur*2	R	tSummai3
A1100E-101	WUH3/4/HYDRANASSA30/SILVER_5//LYMNO_8/3/ATIL/7/4*ECO/CMH76A.722//BIT/3/ALTAR 84/4/AJAIA_2/5/KJOVE_1/6/MALMUK_1/SERRATOR_1	R
A1100E-102	WUH3/4/HYDRANASSA30/SILVER_5//LYMNO_8/3/ATIL/7/4*ECO/CMH76A.722//BIT/3/ALTAR 84/4/AJAIA_2/5/KJOVE_1/6/MALMUK_1/SERRATOR_1	R
A1100G-737	USDA595/3/D67.3/RABI//CRA/4/ALO/5/HUI/YAV_1/6/ARDENTE/7/HUI/YAV79/8/POD_9/9/ADAMAR_15//ALBIA_1/ALTAR 84/3/SNITAN	R
CIRNO C 2008	SOOTY_9/RASCON_37//CAMAYO	R
A0900C-003	Intro from Japan	R
A0900C-004	Intro from Japan	R
DBC-144-12-5	Sumai-3/Semperdur*4	R
DBC-144-12-15	Sumai-3/Semperdur*4	R
DBC-144-12-14	Sumai-3/Semperdur*4	R
DBC-480-10-2	Sumai-3/Semperdur*4	R
DBC-480-fam-3	Sumai-3/Semperdur*4	R
DBC-480-1	Sumai-3/Semperdur*4	R
P17x38	DBC-480-1/Karur	R
P32x11	DBC-480-1/Durobonus	R
P32x21	DBC-480-1/Durobonus	R
P32x23	DBC-480-1/Durobonus	R
P32x32	DBC-480-1/Durobonus	R
P32x36	DBC-480-1/Durobonus	R
P32x40	DBC-480-1/Durobonus	R
P48x34	DBC-480-1/SZD1029K	R
R11x26x1	Heli94/Karur//SZD1029K/DBC-480-1	R
R7x56x1	I19-94-1/Durobonus//SZD1029K/Heli94	R
A1400C-021	(Plac 1485/PI 94725) F3	R
DT828	Commander/G9574-AZ3E//9767A-124E	R
A0262&AM050	9767A-124B/DT733	R
A1400C-019	(Vernal/94 SM-756) F3	R
R11x38x2	Heli94/Karur//SZD1029K/DBC-480-1	R
A1400C-023	PLAC 1485 / PI 94725 F2	R
A0805-JL04	STRONGFIELD/UC1113-GPC//DT819	R
R11x15x1	Heli94/Karur//SZD1029K/DBC-480-1	R
A1400C-013	94 SM-768/PI 94725//EdmoreF2	R
Pelissier		R
Heli-9-9	T.dicoccum-161/Helidur*2	R

## Sheet: Sheet3
Table S2: Genotypes of the 228 durum wheat lines for the 13 significant marker-trait associations detected for Fusarium head blight severity (FHB), plant height (PH) and flowering date (FD). Chromosomal positions and associated markers are given. The SNP alleles associated with FHB resistance, shorter plant height or earlier flowering are shown in grey. In addition, allelic diversity for the Fhb1…
Trait
Chromosome
Position (cM)
Marker/Genotype
1A.1D_5+10-6/2*WB881//1A.1D_5+10-6/3*MOJO/3/BISU_1/PATKA_3
1A.1D_5+10-6/3*MOJO//RCOL
AC_Avonlea
AC_Morse
AC_Navigator
AC_Pathfinder
Acalou
ADYT_02_-_505_(OSA-1/STJ-5)
AGHRASS-1
Agridur
AINZEN-1
AJAIA_12/F3LOCAL(SEL.ETHIO.135.85)//PLATA_13/3/SOMAT_3/4/SOOTY_9/RASCON_37
ALDEANO
AMEDAKUL-1
AMMAR-1
ANGRE
ANOUAR
ANTON
APPIO
APPULO
Arcalis
ARCANGELO
ARCOBALENO
Ardente
ARISLAHN-5
ARMENT//SRN_3/NIGRIS_4/3/CANELO_9.1
Arstar
ARTENA
ASTIGI
Astrodur
ATLAST-1
Auroc
AUS-1
AW12/BIT
AWALI-1
AZEGHAR-2
BCRCH-1
Belzer
Ben
BIC/3/CHAM1//GRA//STK
BICRE
BICREDERAA-1
BIGOST-1
BLK2
BOABDIL
BOLENGA
BOLIDO
BOLO
BOMBASI
BORLI
BRACHOUA
BRADANO
BRAVADUR
Brindur
BRONTE
BRONTE
CANNIZZO
CANYON
CAPEITI_8
CHABA/DERAA
CHABHA_88
CHACAN
CHAM-1
CHEN_1/TEZ/3/GUIL//CIT71/CII/4/SORA/PLATA_12/5/STOT//ALTAR_84/ALD
CICCIO
CIMMYT_266
CIMMYT_67
CIMMYT_73
CIMMYT-108
CIMMYT-136
CIMMYT-172
CIMMYT-198
CIMMYT-222
CIMMYT-247
CIMMYT-260
CIMMYT-36
CIMMYT-41
CIMMYT-47
CIMMYT-52
CIMMYT-78
CLAUDIO
CNDO/PRIMADUR//HAI-OU_17/3/SN_TURK_MI83-84_375/NIGRIS_5//TANTLO_1
COLORADO
Colorado
COLOSSEO
CORTEZ
CRESO
DERAA
DON_PEDRO
DUILIO
DUREX
DUROI
EUDO//CHEN_1/TEZ/3/TANTLO_1/4/PLATA_6/GREEN_17
Excalibur
Exeldur
Extradur
FLAMINIO
FORTORE
FURAT-1
GARGANO
GEDIZ/FGO//GTA/3/SRN_1/4/TOTUS/5/ENTE/MEXI_2//HUI/3/YAV_1/GEDIZ/6/SOMBRA_20/7/STOT//ALTAR_84/ALD
GEROMTEL-1
GIDARA-2
GR/BOY
GRAZIA
GUEROU-1
H.MOUL(MOR)/CHABA_88
HAURANI
HEIDER
Helidur
ICARDA_121
ICARDA_78
ILLORA
INRAM_1804
INRAM_1805
INRAM_1807
INRAM_1808
IRIDE
ISLY
ITALO
IXOS
JABATO
JAWHAR
JORDAN
KABIR1
Kamilaroi
KARIM
KHABUR-1
KOFA
KRF
KRONOS
KRS/HAUCAN
LAGONIL-2
LAGOST_3
LAHN
LESINA
Levante
LIRA_B_45
Lloyd
LOUKOS-1
MAAMOURI-1
MALMUK_1//LOTUS_5/F3LOCAL(SEL.ETHIO.135.85)
MARJANA
MARSYR-1
MARZAK
MERIDIANO
MESSAPIA
MEXICALI_C75
MIKI-1
MOHAWK
MONGIBELLO
MOULSABIL_2
MRB17
Munich
MURLAGOST-1
Nefer
Neodur
NILE
NORBA
OFANTO
OMBAR
OMBIT-1
OMGENIL-3
OMLAHN-3
OMRABI_3
OMRABI_5
OMRUF-2
ORT-1
OTB-6
OUASERL-1
OUASLAHN-1
OUASLOUKOS-1
OURGH
PIETRAFITTA
PLATA_10/6/MQUE/4/USDA573//QFN/AA_7/3/ALBA-D/5/AVO/HUI/7/PLATA_13/8/THKNEE_11/9/CHEN/ALTAR_84/3/HUI/POC//BUB/RUFO/4/FNFOOT
PLATANI
Plaza
PLINIO
Primadur
PRODURA
QUABRACH-1
QUAD//ERP/MAL/3/UNKN
QUADALETE
QUADRATO
RADIOSO
RANCO//CIT71/CII/3/COMDK/4/TCHO//SHWA/MALD/3/CREX/5/SN_TURK_MI83-84_375/NIGRIS_5//TANTLO_1
RAZZAK
REVA
ROLA_5/3/AJAIA_12/F3LOCAL(SEL.ETHIO.135.85)//PLATA_13/4/MALMUK_1/SERRATOR_1
ROQUENO
SAJUR
SEBAH
SEBATEL-1
SEBOU
Semperdur
SENADUR
SHABHA
Simeto
SOMAT_3/PHAX_1//TILO_1/LOTUS_4
SOMAT_4/INTER_8_(SAMAYOA_C2004)
Sooty_9/RASCON_37(ATILC2000)
STOJOCRI-3
STOT//ALTAR_84/ALD_(JUPARE_C2003)
SULA
SVEVO
Tacna
TAREK
TENSIFT-1
TERBOL97-3
Tetradur
TOMOUH
Topdur
TORREBIANCA
TRINAKRIA
TUNSYR-1
USDA595/3/D67.3/RABI//CRA/4/ALO/5/HUI/YAV_1/6/ARDENTE/7/HUI/YAV79/8/POD_9
VALBELICE
VALNOVA
VANRRIKSE_6.2//1A-1D_2+12-5/3*WB881
VARANO
WADALMEZ-1
WEST_BRED_881
WEST_BRED_TURBO
Wollaroi
Yallaroi
YASMINE
YOUSEF-1
ZEINA_1
